# Supplementary material for: Zoledronic acid promotes osteoclasts ferroptosis by inhibiting FBXO9-mediated p53 ubiquitination and degradation
Source: PeerJ. 2021 Dec 16;9:e12510. doi: 10.7717/peerj.12510 (PMC8684721; doi:10.7717/peerj.12510)
Supplement: Supplemental Information 1 [file peerj-09-12510-s001.xlsx]

## Sheet: 1-1
Control	5	10	50
109.24	100.95	92.53	61.06
92.53	94.69	88.39	47.97
98.23	83.95	76.18	48.16
100	93.1967	85.7	52.3967
8.49445	8.59782	8.50045	7.50327

## Sheet: 1-2
Control	5	10	50
91.61	99.88	79.27	63.56
99.78	94.24	59.89	61.25
108.6	87.89	73.84	52.2
99.9967	94.0033	71	59.0033
8.49707	5.9985	9.99726	6.004

## Sheet: 1-3
Control	5	10	50
92	97.34	74.54	55.43
108.92	83.3	74.71	50.99
99.06	101.65	95.24	43
99.9933	94.0967	81.4967	49.8067
8.49853	9.59531	11.9024	6.29892

## Sheet: 1-4
Control	5	10	50
94.5	103.51	65.76	38.3
95.71	99.84	79.71	55.89
109.79	84.65	79.52	43.82
100	96	74.9967	46.0033
8.49995	9.9992	7.99975	8.99596

## Sheet: 1-5
	Control	necrostatin-1	ZVAD-FMK	ferrostatin-1
Control	96.85	104.56	95.59	106.52
	94.42	95.25	104.6	95.91
	108.71	110.69	94.12	95.25
ZOL(50uM)	42.71	73.86	59.49	81.67
	59.16	71.14	73.79	91.84
	53.17	61.76	66.44	95.43
	51.68	68.92	66.5733	89.6467
	8.32561	6.34813	7.15093	7.1374

## Sheet: 1-6
	Control	necrostatin-1	ZVAD-FMK	ferrostatin-1
Control	91.18	107.7	93.39	97.12
	104.81	86.86	111.48	86.12
	104.02	104.38	105.82	108.24
ZOL(50uM)	56.34	76.83	77.1	100.51
	64	61.53	66.91	90.42
	67.2	69.39	69.78	83.7
	65.6	65.46	68.345	87.06
	2.26274	5.55786	2.0294	4.75176

## Sheet: 2-1
Control	5	10	50
110.67	117.92	114.44	198.67
100.82	99.43	121.27	173.1
88.51	103.04	136.51	187.12
94.665	101.235	128.89	180.11
8.70448	2.55266	10.7763	9.91364

## Sheet: 2-2
Control	5	10	50
0.43	0.46	0.89	2.01
0.35	0.41	1.03	1.83
0.44	0.51	1.17	2.03
0.395	0.46	1.1	1.93
0.0636396	0.0707107	0.0989949	0.141421

## Sheet: 2-3
Control	5	10	50
1.12	1.24	1.26	1.62
0.89	0.98	1.38	1.77
0.98	1.12	1.48	1.9
0.935	1.05	1.43	1.835
0.0636396	0.0989949	0.0707107	0.0919239

## Sheet: 2-4
Control	5	10	50
0.93	0.99	0.75	0.56
0.93	0.87	0.94	0.59
1.13	1.03	0.86	0.46
1.03	0.95	0.9	0.525
0.141421	0.113137	0.0565685	0.0919239

[truncated: 50 more sheets: 2-5, 2-6, 2-7 ELISA, 2-8 ELISA, 2-9 ELISA, 2-10 ELISA, 3-1 qPCR CFAP53, FBXO9, ARSJ, ABCA9, CXorf57, GPR22, STXBP5L, MSANTD4, RRP15, UGT1A3, IRF4, TFAP2D, TRHDE, ASMT …]
